# Supplementary material for: Adjuvant chemoradiotherapy versus radiotherapy alone in women with high-risk endometrial cancer (PORTEC-3): patterns of recurrence and post-hoc survival analysis of a randomised phase 3 trial
Source: PubMed Central journal article supplement (PMC6722042; doi:10.1016/s1470-2045(19)30395-x), 2019-09
Supplement: mmc1.pdf [file mmc1.pdf]

# THE LANCET Oncology

## Supplementary appendix

This appendix formed part of the original submission and has been peer reviewed. We post it as supplied by the authors.

Supplement to: de Boer S M, Powell M E, Mileskin L, et al. Adjuvant chemoradiotherapy versus radiotherapy alone in women with high-risk endometrial cancer (PORTEC-3): patterns of recurrence and post-hoc survival analysis of a randomised phase 3 trial. *Lancet Oncol* 2019; published online July 22. [http://dx.doi.org/10.1016/S1470-2045\(19\)30395-X](http://dx.doi.org/10.1016/S1470-2045(19)30395-X).

## PORTEC 3 Study group and participating centres

### PORTEC-3 Independent data monitoring committee:

L.V.A.M. Beex, N. James, M.J.M. Olofsen-van Acht, W. Parulekar, W.L.J. van Putten, D. Rischin, J. Yarnold (chair)

**PORTEC-3 trial statistician:** H. Putter

### List of participating countries and centres (listed in order of patients recruited):

#### United Kingdom: 184 patients (177 evaluable)

**Study Coordinators:** M. Powell (P.I.), London; H. Kitchener, Manchester; J. Ledermann, London

**Group coordinating trial centre:** Cancer Research UK and UCL Cancer Trials Centre, London

**Trial pathologists:** N. Singh, London; G. Wilson, Manchester

#### Participating centres and principal investigator(s) (number of patients):

London-Barts Health NHS Trust (M. Powell, 23); London-University College London Hospitals NHS Foundation Trust (M. McCormack, 15); Bebington, Wirral-The Clatterbridge Cancer Centre NHS Foundation Trust (K. Whitmarsh, K. Hyatt, 12); Wolverhampton-The Royal Wolverhampton NHS Trust (R. Allerton, 11); Cambridge-Cambridge University Hospitals NHS Foundation Trust (L.T. Tan, M. Iddawela, D. Gregory, S. Ayres, 11); Leicester-Leicester Royal Infirmary (P. Symonds, 10); Northwood-Mount Vernon Cancer Centre (P. Hoskin, 10); Middlesborough-The James Cook University Hospital (A. Rathmell, M. Adusumalli, 9); Nottingham-Nottingham City Hospital (S. Chan, A. Anand, 9); Norwich-Norfolk and Norwich University Hospitals NHS Foundation Trust (R. Wade, 8); Guildford-Royal Surrey County Hospital (A. Stewart, 6); Newcastle Upon Tyne-Freeman Hospital (W. Taylor, 6); Brighton-Brighton & Sussex University Hospitals NHS Trust (K. Lankester, 5); Coventry-University Hospital Coventry (C. Irwin, M. Hocking, 5); Taunton-Musgrove Park Hospital (P. Jankowska, D. Milliken, C. Barlow, 5); Cheltenham-Cheltenham General Hospital (A. Cook, R. Counsell, 4); Exeter-Royal Devon & Exeter Hospital (P. Bliss, A. Hong, 4); Lincoln-Lincoln County Hospital (M. Panades, 4); Romford-Queens Hospital (M. Quigley, 4); Manchester-The Christie NHS Foundation Trust (S. Davidson, 3); Northampton-Northampton General Hospital NHS Trust (C. Mak, 3); Preston-Royal Preston Hospital (A. Hindley, 3); Truro-Royal Cornwall Hospitals NHS Trust (A. Thomson, 3); Sheffield-Weston Park Hospital (S. Pledge, J. Martin, 2); Shrewsbury-Royal Shrewsbury Hospital (S. Awwad, A. Zachariah, 2); Carlisle-North Cumbria University Hospitals NHS Trust (S. Singhal, 1); Colchester-Essex County Hospital (A. Lamont, 1); London-Guy's and St. Thomas' NHS Foundation Trust (A. Winship, A. Montes, V. Mullassery, 1); London-Hammersmith Hospital - Imperial College Healthcare NHS Trust (A. Taylor, 1); Poole-Poole Hospital NHS Foundation Trust (V. Laurence, M. Flubacher, 1); Reading-Royal Berkshire Hospital (H. O'Donnell, 1); Stoke-on-Trent-Royal Stoke University Hospital (R. Bhana, S. Lupton, 1)

#### The Netherlands: 145 patients (138 evaluable)

**Study Coordinators:** C.L. Creutzberg (C.I.), Leiden; R. Kruitwagen, Maastricht; H. Nijman, Groningen; N. Ottevanger, Nijmegen

**Group coordinating trial centre:** Netherlands Comprehensive Cancer Organisation (IKNL), Leiden

**Trial pathologists:** H. Hollema, Groningen; V.T. Smit, Leiden

#### Participating centres and principal investigator(s) (number of patients):

University Medical Center Utrecht (I.M. Jurgenliemk-Schulz, 20); Maastricht Clinic, Maastricht (L.C.H.W. Lutgens, 17); University Medical Center Groningen (E. Pras, 15); Leiden University Medical Center (C.L. Creutzberg, R. Nout, 15); University Medical Center Radboud, Nijmegen (J.W.H. Leer, A. Snyers, 11); Academic Medical Center, Amsterdam (A.L.J. Uitterhoeve, G.H. Westerveld, 9); Medical Spectre Twente, Enschede (J.J. Jobsen, 9); Radiotherapy institute Friesland, Leeuwarden (A. Slot, 9); Erasmus Medical Center Rotterdam (J.W.M. Mens, 8); Medical Center Haaglanden/ Radiotherapy Centre West (T.C. Stam, P.C.M. Koper, 7); Netherlands Cancer Institute, Amsterdam (B. van Triest, 6); Radiotherapy Group, Arnhem (E.M. van der Steen-Banasik, 6); Radiotherapy Institute Verbeeten, Tilburg (K.A.J. de Winter, 6); Radiotherapy Group, Deventer (S. van de Pol, 3); Catharina Hospital, Eindhoven (H.A. van den Berg, 3); VU Medical Centre, Amsterdam (O.W.M. Meijer, 1)

#### Australia & New Zealand: 122 patients (118 evaluable)

**ANZGOG Study Coordinators:** L. Mileschkin (P.I.) Melbourne; M. Quinn, Melbourne; P. Khaw Melbourne; I.Kolodziej, Sydney

**Group coordinating trial centre:** NHMRC Clinical Trials Centre, Sydney

**Trial pathologist:** J.Pyman, Melbourne

**Participating centres and principal investigator(s) (number of patients):**

Peter MacCallum Cancer Centre, Melbourne, Victoria, Australia (L. Mileskin, P.Khaw; 31); Monash Cancer Centre (Monash Medical Centre), East Bentleigh, Victoria, Australia (P. Khaw/G. Goss, 20); Westmead Hospital, Wentworthville, NSW, Australia (G. Wain, 15); Auckland City Hospital, Auckland, New Zealand (S. Brooks, 13); Wellington Blood & Cancer Centre, Wellington, New Zealand (C. Johnson, 11); Calvary Mater Newcastle, Newcastle, Australia (A. Capp, 8); Christchurch Hospital, Canterbury, New Zealand (M. Vaughan, 4); Royal Hobart Hospital, Hobart, Tasmania, Australia (P. Blomfield, 3); Palmerston North Hospital, Palmerston North, New Zealand (C. Hardie, 3); Royal North Shore Hospital, St Leonards, NSW, Australia (M. Stevens, 3); Waikato Hospital, Hamilton, New Zealand (M. Kuper, 2); Royal Brisbane & Women's Hospital, Brisbane, QLD, Australia (R. Cheuk, 2); Liverpool Hospital, Liverpool, NSW, Australia (S. Vinod, 2); Mater Hospital Brisbane, South Brisbane, QLD, Australia (C. Shannon/J. Ramsay, 2); Wollongong Hospital, Wollongong, NSW, Australia (A. Glasgow, 2); Townsville Hospital, Townsville, QLD, Australia (S. Hewitt, 1)

**Italy: 103 patients (98 evaluable)**

**MaNGO Study Coordinators:** R. Fossati (P.I.) Milano; D. Katsaros, Torino; A. Colombo, Lecco

**Group coordinating trial centre:** Istituto di Ricerche Farmacologiche Mario Negri, Milano

**Trial pathologists:** S. Carinelli, Milano; C. Di Tonno, Milano

**Participating centres and principal investigator(s) (number of patients):**

Torino - S. Anna Hospital (S. Gribaudo, M. Mitidieri, 33); Lecco - Ospedale A. Manzoni (R. D'Amico, 24); Monza - S. Gerardo Hospital (S. Meregalli, A. A. Lissoni, 16); Torino - Ospedale Umberto I (A. Ferrero, 7); Padova - Istituto Oncologico Veneto / Mirano, Venezia - Azienda ULSS 13 (L. Corti, G. Artioli, 6); Varese - H. Del Ponte University of Insubria (C. Apolloni, 4); Ravenna - Ospedale S. Maria delle Croci (D. Turci, 4); Brescia - Spedali Civili (G. Tognon, 2); Como - ASST Lariana Ospedale S. Anna (E. Bianchi, 2); Meldola - Istituto Scientifico Romagnolo per lo Studio e la Cura dei Tumori (E. Bianchi, 2); Genova - IRCCS San Martino IST (M. Bruzzone, 1); Milano - ASST Grande Ospedale Metropolitano Niguarda (S. Siena, 1); Palermo - AOR Villa Sofia-Cervello (N. Varsellona, 1)

**Canada: 65 patients (65 evaluable)**

**CCTG Study Coordinators:** A. Fyles Toronto, Ontario; P. Bessette, Sherbrooke, Quebec

**Group coordinating trial centre:** Canadian Cancer Trials Group, Kingston, Ontario

**Trial pathologist:** M. McLachlin, London, Ontario

**Participating centres and principal investigator(s) (number of patients):**

Sherbrooke-Centre Hosp. Universitaire de Sherbrooke (P. Bessette, 18); Montreal-Hopital Notre-Dame de Montreal (D. Provencher, 11); Calgary-Tom Baker Cancer Centre (P. Ghatage, 9); Halifax-Queen Elizabeth II Health Sciences Centre (P. Rittenberg, 8); Montreal-McGill Oncology Montreal (L. Souhami, 7); Toronto-Sunnybrook Health Sciences Centre (G. Thomas, 7); Quebec-Hotel-Dieu de Quebec (M. Plante, 2); London-London Health Sciences Centre (A. Hammond, 1); St John's-Dr. H. Bliss Murphy Cancer Centre (P. Power, 1); Toronto-Princess Margaret Hospital (A. Fyles, 1)

**France: 67 patients (64 evaluable)**

**FEDEGYN Study Coordinator:** Chr. Haie-Meder (P.I.) Paris

**Group coordinating trial centre:** UNICANCER, Paris

**Trial pathologist:** P. Duvillard, Paris

**Participating centres and principal investigator(s) (number of patients):**

Besancon-Hopital Jean Minjoz (M-H Baron, 10); Rouen-Centre Henri Becquerel (Hanzen, 9); Saint Herblain-Centre Rene Gauducheau (D. Berton-Rigaud, 8); Limoges-CHU Limoges (Pr. N. Tubiana-Mathieu, 6); Bordeaux-Institut Bergonie (L. Thomas, 5); Reims-Institut Jean Godinot (A. Savoye, S. Maillard, 5); Dijon-Centre Georges Francois Leclerc (K. Peignaux, 4); Paris/ Villejuif-Institut Gustave Roussy (C. Haie Meder, 4); Clermont-Ferrand-Centre Jean Perrin (C. Benoit, 3); Montpellier-Centre Val d'Aurelle (C. Kerr, 3); Toulouse Cedex-Institut Claudius Regaud (L. Gladiéff, 3); Caen-Centre Francois Baclesse (D. Lerouge, 2); Nice Cedex-Centre Antoine Lacassagne (P. Follana, 2); Marseille-Institut Paoli Calmettes (M. Cappiello, 1); Strasbourg-Centre Paul Strauss (T. Petit, 1); Tours Cedex-CHU de Tours - Hopital Bretonneau (I. Barillot, 1)

**Table S1: Treatment for first recurrence**

| Treatment                             | Total      |               | RT         |               | RT + CT   |               |
|---------------------------------------|------------|---------------|------------|---------------|-----------|---------------|
|                                       | N          | %             | N          | %             | N         | %             |
| Chemotherapy*                         | 78         | 42.2%         | 48         | 46.6%         | 30        | 36.6%         |
| Hormonal therapy                      | 26         | 14.1%         | 13         | 12.6%         | 13        | 15.9%         |
| Radiotherapy                          | 15         | 8.1%          | 7          | 6.8%          | 8         | 9.8%          |
| Surgery                               | 11         | 5.9%          | 7          | 6.8%          | 4         | 4.9%          |
| Targeted therapy                      | 2          | 1.1%          | 0          | 0.0%          | 2         | 2.4%          |
| Surgery + radiotherapy                | 5          | 2.7%          | 1          | 1.0%          | 4         | 4.9%          |
| Surgery + hormonal therapy            | 2          | 1.1%          | 0          | 0.0%          | 2         | 2.4%          |
| Surgery + chemotherapy                | 4          | 2.2%          | 3          | 2.9%          | 1         | 1.2%          |
| Surgery + radiotherapy + chemotherapy | 1          | 0.5%          | 1          | 1.0%          | 0         | 0.0%          |
| Radiotherapy + hormonal therapy       | 6          | 3.2%          | 3          | 2.9%          | 3         | 3.7%          |
| Radiotherapy + chemotherapy           | 5          | 2.7%          | 2          | 1.9%          | 3         | 3.7%          |
| Chemotherapy + hormonal therapy       | 2          | 1.1%          | 2          | 1.9%          | 0         | 0.0%          |
| Unknown                               | 1          | 0.5%          | 1          | 1.0%          | 0         | 0.0%          |
| No treatment                          | 27         | 14.6%         | 15         | 14.6%         | 12        | 14.6%         |
| <b>Total</b>                          | <b>185</b> | <b>100.0%</b> | <b>103</b> | <b>100.0%</b> | <b>82</b> | <b>100.0%</b> |

\* Radiotherapy group: 43 patients received carboplatin + paclitaxel; 2 carboplatin; 1 adriamycine + cisplatin; 1 paclitaxel; 1 paclitaxel, epirubicine, cisplatin). Chemoradiotherapy group: 12 patients received carboplatin + paclitaxel; 5 adriamycine + cisplatin; 4 carboplatin + doxorubicine; 3 doxorubicine; 2 carboplatin + epirubicine; 1 paclitaxel; 1 cyclophosphamide, adriamycine, cisplatin; 1 apegilone; 1 unknown.

*Abbreviations:* CTRT: chemotherapy plus radiotherapy. RT: radiotherapy.

Table S2: Late toxicity reported by physicians using the CTCAE v3.0 at 12, 36 and 60 months of follow-up.

|                                | 12 months             |         |           |                       |        |           | 36 months             |         |           |                       |        |           | 60 months             |         |           |        |        |      |
|--------------------------------|-----------------------|---------|-----------|-----------------------|--------|-----------|-----------------------|---------|-----------|-----------------------|--------|-----------|-----------------------|---------|-----------|--------|--------|------|
|                                | CTRTR n=316; RT n=319 |         |           | CTRTR n=272; RT n=273 |        |           | CTRTR n=201; RT n=187 |         |           | CTRTR n=201; RT n=187 |        |           | CTRTR n=201; RT n=187 |         |           |        |        |      |
|                                | Grade 2               |         | Grade 3/4 | Grade 2               |        | Grade 3/4 | Grade 2               |         | Grade 3/4 | Grade 2               |        | Grade 3/4 | Grade 2               |         | Grade 3/4 |        |        |      |
|                                | CTRTR                 | RT      | p*        | CTRTR                 | RT     | p#        | CTRTR                 | RT      | p*        | CTRTR                 | RT     | p#        | CTRTR                 | RT      | p*        | CTRTR  | RT     | p#   |
| n (%)                          | n (%)                 |         | n (%)     | n (%)                 |        | n (%)     | n (%)                 |         | n (%)     | n (%)                 |        | n (%)     | n (%)                 |         | n (%)     | n (%)  |        |      |
| <b>Any</b>                     | 103 (33)              | 89 (28) | 0.04      | 33 (10)               | 21 (7) | 0.09      | 62 (23)               | 49 (18) | 0.06      | 22 (8)                | 16 (6) | 0.32      | 59 (29)               | 33 (18) | 0.002     | 17 (8) | 10 (5) | 0.24 |
| <b>Any grade 3</b>             | na                    | na      |           | 27 (9)                | 19 (6) |           | na                    | na      |           | 21 (8)                | 17 (7) |           | na                    | na      |           | 16 (8) | 10 (5) |      |
| <b>Any grade 4</b>             | na                    | na      |           | 6 (2)                 | 2 (1)  |           | na                    | na      |           | 1 (0)                 | 0 (0)  |           | na                    | na      |           | 1 (0)  | 0 (0)  |      |
| Auditory/hearing               | 10 (3)                | 2 (1)   | 0.02      | 0 (0)                 | 0 (0)  | 1.00      | 1 (0)                 | 1 (0)   | 1.00      | 1 (0)                 | 1 (0)  | 1.00      | 4 (2)                 | 1 (1)   | 0.29      | 2 (1)  | 1 (1)  | 1.00 |
| Hypertension                   | 14 (4)                | 17 (5)  | 0.62      | 4 (1)                 | 5 (2)  | 1.00      | 15 (6)                | 17 (6)  | 0.75      | 5 (2)                 | 6 (2)  | 1.00      | 16 (8)                | 16 (9)  | 0.87      | 4 (2)  | 4 (2)  | 1.00 |
| Lymphatics (edema)             | 8 (3)                 | 3 (1)   | 0.11      | 2 (1)                 | 1 (0)  | 0.62      | 3 (1)                 | 1 (0)   | 0.12      | 2 (1)                 | 0 (0)  | 0.25      | 5 (2)                 | 0 (0)   | 0.06      | 0 (0)  | 0 (0)  | 1.00 |
| <b>GI - any</b>                | 21 (7)                | 19 (6)  | 0.24      | 7 (2)                 | 2 (1)  | 0.11      | 11 (4)                | 17 (6)  | 0.46      | 2 (1)                 | 1 (0)  | 0.62      | 16 (8)                | 9 (5)   | 0.19      | 2 (1)  | 1 (1)  | 1.00 |
| Diarrhea                       | 11 (3)                | 8 (3)   | 0.39      | 1 (0)                 | 1 (0)  | 1.00      | 4 (1)                 | 8 (3)   | 0.42      | 1 (0)                 | 1 (0)  | 1.00      | 7 (3)                 | 7 (4)   | 1.00      | 0 (0)  | 0 (0)  | 1.00 |
| Ileus/obstruction              | 2 (1)                 | 3 (1)   | 0.77      | 4 (1)                 | 2 (1)  | 0.45      | 0 (0)                 | 0 (0)   | 0.50      | 1 (0)                 | 0 (0)  | 0.50      | 2 (1)                 | 1 (1)   | 0.37      | 2 (1)  | 0 (0)  | 0.50 |
| <b>Hematological - any</b>     | 26 (8)                | 21 (7)  | 0.89      | 4 (1)                 | 7 (2)  | 0.55      | 3 (1)                 | 3 (1)   | 1.00      | 1 (0)                 | 2 (1)  | 1.00      | 5 (2)                 | 5 (3)   | 1.00      | 0 (0)  | 0 (0)  | 1.00 |
| Lymphocytes                    | 24 (8)                | 22 (7)  | 0.89      | 4 (1)                 | 5 (2)  | 1.00      | 3 (1)                 | 3 (1)   | 1.00      | 2 (1)                 | 1 (0)  | 1.00      | 3 (1)                 | 4 (2)   | 0.74      | 0 (0)  | 0 (0)  | 1.00 |
| <b>Neuropathy - any</b>        | 26 (8)                | 1 (0)   | <0.001    | 4 (1)                 | 1 (0)  | 0.22      | 17 (6)                | 2 (1)   | <0.001    | 3 (1)                 | 0 (0)  | 0.12      | 13 (6)                | 0 (0)   | <0.001    | 1 (0)  | 0 (0)  | 1.01 |
| Neuropathy - motor             | 1 (0)                 | 0 (0)   | 0.22      | 3 (1)                 | 1 (0)  | 0.37      | 3 (1)                 | 2 (1)   | 0.45      | 1 (0)                 | 0 (0)  | 0.50      | 1 (0)                 | 0 (0)   | 0.50      | 1 (0)  | 0 (0)  | 1.02 |
| Neuropathy - sensory           | 26 (8)                | 1 (0)   | <0.001    | 4 (1)                 | 1 (0)  | 0.22      | 17 (6)                | 1 (0)   | <0.001    | 3 (1)                 | 0 (0)  | 0.12      | 12 (6)                | 0 (0)   | <0.001    | 1 (0)  | 0 (0)  | 1.03 |
| <b>Pain - any</b>              | 26 (8)                | 22 (7)  | 0.18      | 8 (3)                 | 3 (1)  | 0.14      | 17 (6)                | 15 (5)  | 0.24      | 4 (1)                 | 0 (0)  | 0.06      | 13 (6)                | 5 (3)   | 0.15      | 3 (1)  | 3 (2)  | 1.00 |
| Joint pain                     | 4 (1)                 | 3 (1)   | 0.72      | 0 (0)                 | 0 (0)  | 1.00      | 2 (1)                 | 5 (2)   | 0.72      | 1 (0)                 | 0 (0)  | 0.50      | 7 (3)                 | 2 (1)   | 0.14      | 2 (1)  | 1 (1)  | 1.00 |
| Muscle pain                    | 4 (1)                 | 1 (0)   | 0.22      | 0 (0)                 | 0 (0)  | 1.00      | 0 (0)                 | 3 (1)   | 0.25      | 0 (0)                 | 0 (0)  | 1.00      | 1 (0)                 | 1 (1)   | 0.61      | 0 (0)  | 1 (1)  | 0.48 |
| Back/pelvic/limbs              | 11 (3)                | 5 (2)   | 0.05      | 3 (1)                 | 1 (0)  | 0.37      | 4 (1)                 | 3 (1)   | 0.50      | 1 (0)                 | 0 (0)  | 0.50      | 0 (0)                 | 2 (1)   | 0.11      | 0 (0)  | 1 (1)  | 0.48 |
| abdomen/cramps                 | 2 (1)                 | 5 (2)   | 0.77      | 3 (1)                 | 2 (1)  | 0.69      | 4 (1)                 | 1 (0)   | 0.12      | 1 (0)                 | 0 (0)  | 0.50      | 2 (1)                 | 0 (0)   | 0.12      | 2 (1)  | 0 (0)  | 0.50 |
| <b>Musculoskeletal (other)</b> | 3 (1)                 | 0 (0)   | 0.12      | 0 (0)                 | 0 (0)  | 1.00      | 1 (0)                 | 0 (0)   | 0.62      | 1 (0)                 | 0 (0)  | 0.50      | 0 (0)                 | 1 (1)   | 1.00      | 1 (0)  | 0 (0)  | 1.00 |
| <b>Pulmonary - dyspnea</b>     | 2 (1)                 | 2 (1)   | 1.00      | 0 (0)                 | 1 (0)  | 1.00      | 1 (0)                 | 0 (0)   | 1.00      | 0 (0)                 | 1 (0)  | 1.00      | 2 (1)                 | 0 (0)   | 0.25      | 0 (0)  | 0 (0)  | 1.00 |
| <b>Genitourinary</b>           |                       |         |           |                       |        |           |                       |         |           |                       |        |           |                       |         |           |        |        |      |
| Incontinence                   | 8 (3)                 | 9 (3)   | 1.00      | 1 (0)                 | 1 (0)  | 1.00      | 8 (3)                 | 3 (1)   | 0.09      | 1 (0)                 | 0 (0)  | 0.50      | 8 (4)                 | 9 (5)   | 1.00      | 0 (0)  | 0 (0)  | 1.00 |
| Obstruction                    | 0 (0)                 | 0 (0)   | 1.00      | 0 (0)                 | 1 (0)  | 1.00      | 0 (0)                 | 0 (0)   | 1.00      | 0 (0)                 | 1 (0)  | 1.00      | 0 (0)                 | 0 (0)   | 1.00      | 0 (0)  | 0 (0)  | 1.00 |
| Urinary frequency              | 4 (1)                 | 8 (3)   | 0.26      | 0 (0)                 | 1 (0)  | 1.00      | 7 (3)                 | 5 (2)   | 0.58      | 0 (0)                 | 0 (0)  | 1.00      | 8 (4)                 | 2 (1)   | 0.14      | 0 (0)  | 1 (1)  | 0.48 |
| <b>Constitutional</b>          |                       |         |           |                       |        |           |                       |         |           |                       |        |           |                       |         |           |        |        |      |
| Fatigue                        | 5 (2)                 | 4 (1)   | 1.00      | 0 (0)                 | 2 (1)  | 0.50      | 1 (0)                 | 0 (0)   | 0.50      | 0 (0)                 | 0 (0)  | 1.00      | 0 (0)                 | 3 (2)   | 0.11      | 0 (0)  | 0 (0)  | 1.00 |
| Other                          | 5 (2)                 | 4 (1)   | 0.54      | 1 (0)                 | 0 (0)  | 0.50      | 1 (0)                 | 0 (0)   | 0.25      | 1 (0)                 | 0 (0)  | 0.50      | 0 (0)                 | 0 (0)   | 1.00      | 1 (0)  | 0 (0)  | 1.00 |
| Other toxicity                 | 0 (0)                 | 0 (0)   | 1.00      | 0 (0)                 | 0 (0)  | 1.00      | 2 (1)                 | 3 (1)   | 1.00      | 1 (0)                 | 1 (0)  | 1.00      | 4 (2)                 | 4 (2)   | 1.00      | 3 (1)  | 2 (1)  | 1.00 |

Abbreviations: CTRT, combined chemotherapy and radiotherapy; RT, radiotherapy; GI, gastro-intestinal; GU, genito-urinary; CTCAE v3.0, Common Terminology Criteria for Adverse Events version 3.0; AE were calculated at each time point. Per AE, the maximum grade per patient was calculated (worst ever by patient). p\* = significant level < 0.01 for grade ≥2, 3 and 4; p# = significant level <0.01 for grade 3 and 4.

**Table S3: Multivariable analysis of prognostic factors for overall survival and failure-free survival**

| <b>Overall Survival</b>     |                      |                    |                         |                    |                |
|-----------------------------|----------------------|--------------------|-------------------------|--------------------|----------------|
|                             | <b># of patients</b> | <b># of events</b> | <b>5yrs OS (95% CI)</b> | <b>HR (95% CI)</b> | <b>P-value</b> |
| <b>Total</b>                | 660                  | 150                |                         |                    |                |
| <b>Prognostic variables</b> |                      |                    |                         |                    |                |
| <b>Arm</b>                  |                      |                    |                         |                    | 0.022          |
| Radiotherapy (RT)           | 330                  | 85                 | 76% (71.6-80.9)         |                    |                |
| Chemoradiotherapy (CRT)     | 330                  | 65                 | 81% (77.2-85.8)         | 0.68 (0.49 - 0.95) |                |
| <b>Age</b>                  |                      |                    |                         |                    | <0.001         |
| < 60 years                  | 268                  | 33                 | 89% (85.2-92.8)         |                    |                |
| 60-69 years                 | 272                  | 73                 | 75% (69.6-80.1)         | 2.35 (1.54-3.58)   |                |
| ≥70 years                   | 120                  | 44                 | 65% (57.1-74.5)         | 3.42 (2.12-5.52)   |                |
| <b>Stage</b>                |                      |                    |                         |                    | <0.001         |
| Stage I + II                | 365                  | 66                 | 83% (79.0-86.9)         |                    |                |
| Stage III                   | 295                  | 84                 | 74% (68.7-78.9)         | 2.50 (1.75 - 3.56) |                |
| <b>Histology and grade</b>  |                      |                    |                         |                    | <0.001         |
| Endometrioid grade 1 + 2    | 258                  | 39                 | 86% (82.2-90.7)         |                    |                |
| Endometrioid grade 3        | 213                  | 49                 | 78% (72.9-84.2)         | 1.91 (1.22 - 2.98) |                |
| Serous / clear cell         | 189                  | 62                 | 69% (62.4-75.8)         | 2.57 (1.66 - 3.97) |                |
| <b>LVSI</b>                 |                      |                    |                         |                    | 0.162          |
| No                          | 271                  | 50                 | 83% (78.7-87.9)         |                    |                |
| Yes                         | 389                  | 100                | 76% (71.4-80.1)         | 1.29 (0.90 - 1.84) |                |
| <b>Lymphadenectomy</b>      |                      |                    |                         |                    | 0.119          |
| No                          | 281                  | 71                 | 75% (70.5-80.8)         |                    |                |
| Yes                         | 379                  | 79                 | 81% (77.3-85.3)         | 0.74 (0.51 - 1.08) |                |

\* Adjusted for participating groups

  

| <b>Failure-Free survival</b> |                      |                    |                 |                    |                |
|------------------------------|----------------------|--------------------|-----------------|--------------------|----------------|
|                              | <b># of patients</b> | <b># of events</b> | <b>5yrs FFS</b> | <b>HR (95% CI)</b> | <b>P-value</b> |
| <b>Total</b>                 | 660                  | 189                |                 |                    |                |
| <b>Prognostic variables</b>  |                      |                    |                 |                    |                |
| <b>Arm</b>                   |                      |                    |                 |                    | 0.007          |
| Radiotherapy (RT)            | 330                  | 105                | 69% (63.8-73.8) |                    |                |
| Chemoradiotherapy (CRT)      | 330                  | 84                 | 76% (71.5-80.7) | 0.67 (0.50-0.90)   |                |
| <b>Age</b>                   |                      |                    |                 |                    | <0.001         |
| < 60 years                   | 268                  | 54                 | 81% (75.9-85.4) |                    |                |
| 60-69 years                  | 272                  | 89                 | 68% (62.0-73.2) | 1.78 (1.26 - 2.52) |                |
| ≥70 years                    | 120                  | 46                 | 65% (55.7-72.7) | 2.20 (1.45 - 3.32) |                |
| <b>Stage</b>                 |                      |                    |                 |                    | <0.001         |
| Stage I + II                 | 365                  | 79                 | 79% (74.6-83.1) |                    |                |
| Stage III                    | 295                  | 110                | 65% (59.0-70.0) | 2.62 (1.90-3.60)   |                |
| <b>Histology and grade</b>   |                      |                    |                 |                    | <0.001         |
| Endometrioid grade 1 + 2     | 258                  | 61                 | 79% (73.6-83.6) |                    |                |
| Endometrioid grade 3         | 213                  | 60                 | 73% (66.0-78.1) | 1.54 (1.05-2.26)   |                |
| Serous / clear cell          | 189                  | 68                 | 64% (57.1-70.8) | 2.12 (1.45-3.10)   |                |
| <b>LVSI</b>                  |                      |                    |                 |                    | 0.042          |
| No                           | 271                  | 63                 | 78% (72.8-82.7) |                    |                |
| Yes                          | 389                  | 126                | 69% (64.1-73.3) | 1.38 (1.01-1.89)   |                |
| <b>Lymphadenectomy</b>       |                      |                    |                 |                    | 0.227          |
| No                           | 281                  | 84                 | 72% (65.9-76.6) |                    |                |
| Yes                          | 379                  | 105                | 74% (68.8-77.8) | 0.81 (0.58-1.14)   |                |

\* Adjusted for participating groups

*Abbreviations:* CRT: chemotherapy plus radiotherapy. RT: radiotherapy. LVSI: lymph vascular space invasion. HR: hazard ratio. CI: confidence interval. OS: overall survival. FFS: failure-free survival.

A. Overall survival

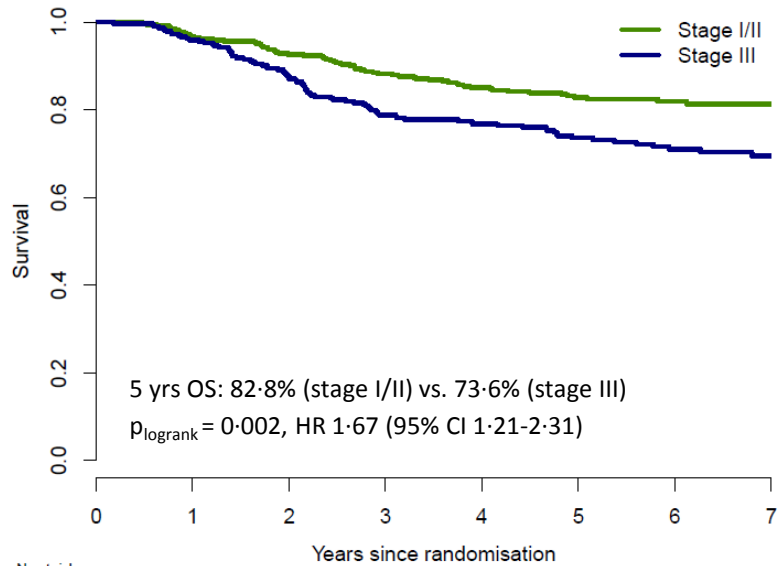

| No at risk:  |     | Years since randomisation |     |     |     |     |     |     |   |
|--------------|-----|---------------------------|-----|-----|-----|-----|-----|-----|---|
|              |     | 0                         | 1   | 2   | 3   | 4   | 5   | 6   | 7 |
| Stage I/II:  | 365 | 353                       | 338 | 317 | 290 | 217 | 146 | 99  |   |
| Stage III:   | 295 | 282                       | 256 | 228 | 216 | 171 | 120 | 71  |   |
| No censored: |     |                           |     |     |     |     |     |     |   |
| Stage I/II:  | 0   | 0                         | 0   | 5   | 21  | 87  | 156 | 202 |   |
| Stage III:   | 0   | 1                         | 2   | 5   | 11  | 48  | 94  | 141 |   |

B. Failure-free survival

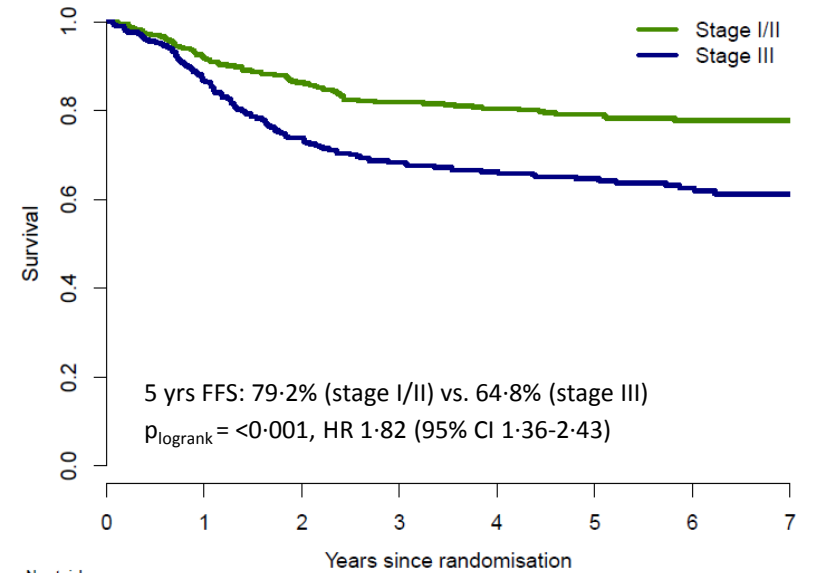

| No at risk:  |     | Years since randomisation |     |     |     |     |     |     |   |
|--------------|-----|---------------------------|-----|-----|-----|-----|-----|-----|---|
|              |     | 0                         | 1   | 2   | 3   | 4   | 5   | 6   | 7 |
| Stage I/II:  | 365 | 335                       | 315 | 290 | 269 | 201 | 133 | 92  |   |
| Stage III:   | 295 | 255                       | 217 | 196 | 183 | 144 | 103 | 61  |   |
| No censored: |     |                           |     |     |     |     |     |     |   |
| Stage I/II:  | 0   | 0                         | 0   | 9   | 25  | 89  | 154 | 195 |   |
| Stage III:   | 0   | 1                         | 1   | 6   | 13  | 48  | 85  | 125 |   |

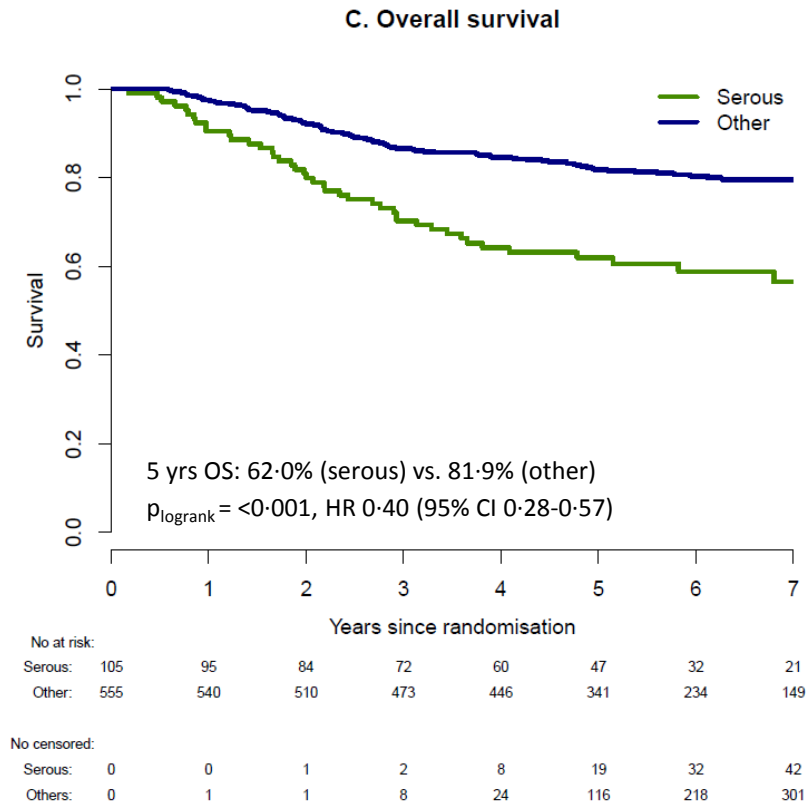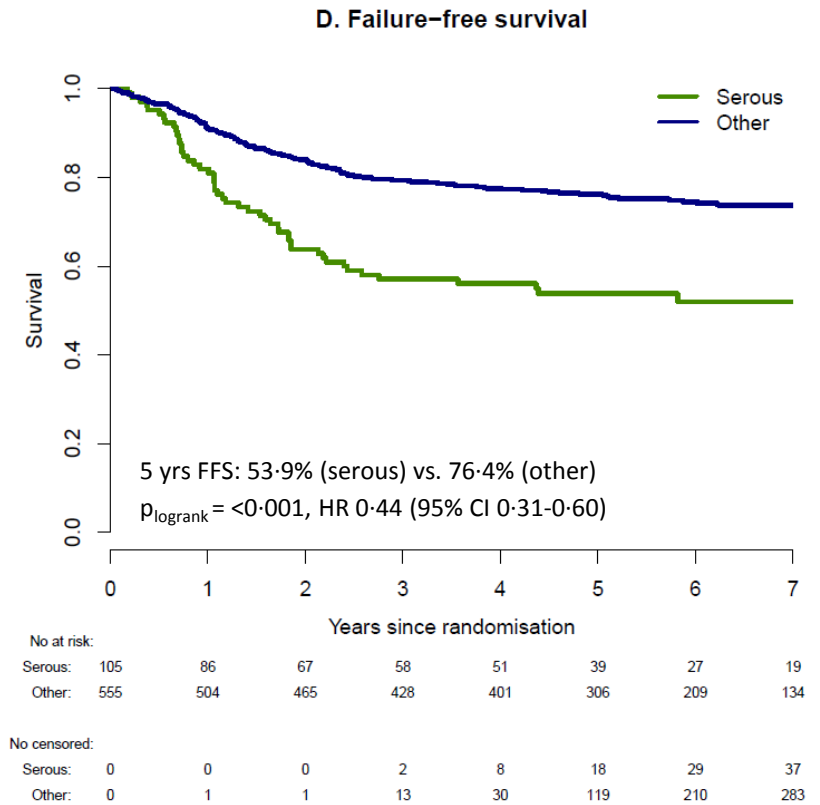

**Figure S4: Overall and failure-free survival**

Kaplan-Meier survival curve for overall survival (A) and failure free survival (B) in patients with stage I/II versus stage III endometrial cancer. Overall survival and failure-free survival for patients with serous cancer versus all other histological types (C and D).



A. Overall survival in stage I/II

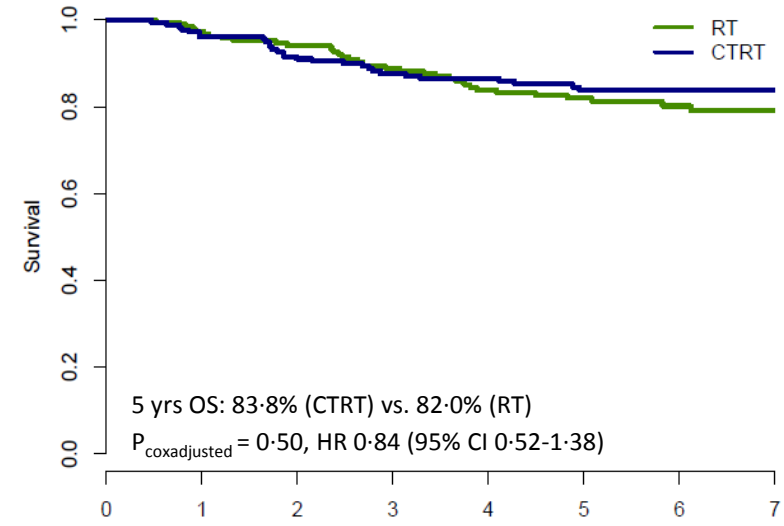

| No at risk:  |     | 0   | 1   | 2   | 3   | 4   | 5  | 6   | 7 |
|--------------|-----|-----|-----|-----|-----|-----|----|-----|---|
| RT:          | 187 | 182 | 176 | 164 | 149 | 109 | 74 | 53  |   |
| CTRT:        | 178 | 171 | 162 | 153 | 141 | 108 | 72 | 46  |   |
| No censored: |     |     |     |     |     |     |    |     |   |
| RT:          | 0   | 0   | 0   | 2   | 8   | 45  | 78 | 98  |   |
| CTRT:        | 0   | 0   | 0   | 3   | 13  | 42  | 78 | 104 |   |

B. Failure-free survival in stage I/II

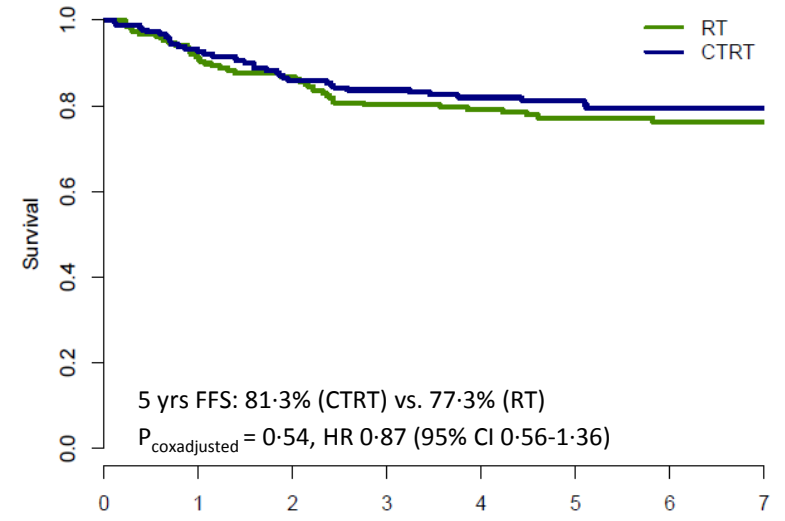

| No at risk:  |     | 0   | 1   | 2   | 3   | 4   | 5  | 6   | 7 |
|--------------|-----|-----|-----|-----|-----|-----|----|-----|---|
| RT:          | 187 | 170 | 162 | 145 | 137 | 100 | 68 | 49  |   |
| CTRT:        | 178 | 165 | 153 | 145 | 132 | 101 | 65 | 43  |   |
| No censored: |     |     |     |     |     |     |    |     |   |
| RT:          | 0   | 0   | 0   | 5   | 11  | 45  | 76 | 95  |   |
| CTRT:        | 0   | 0   | 0   | 4   | 14  | 44  | 78 | 100 |   |

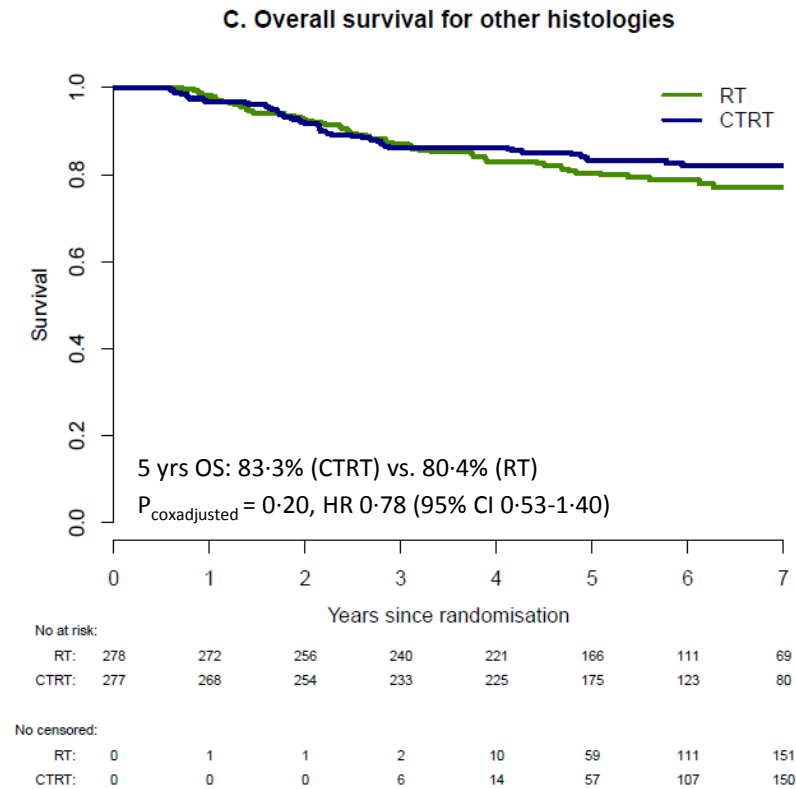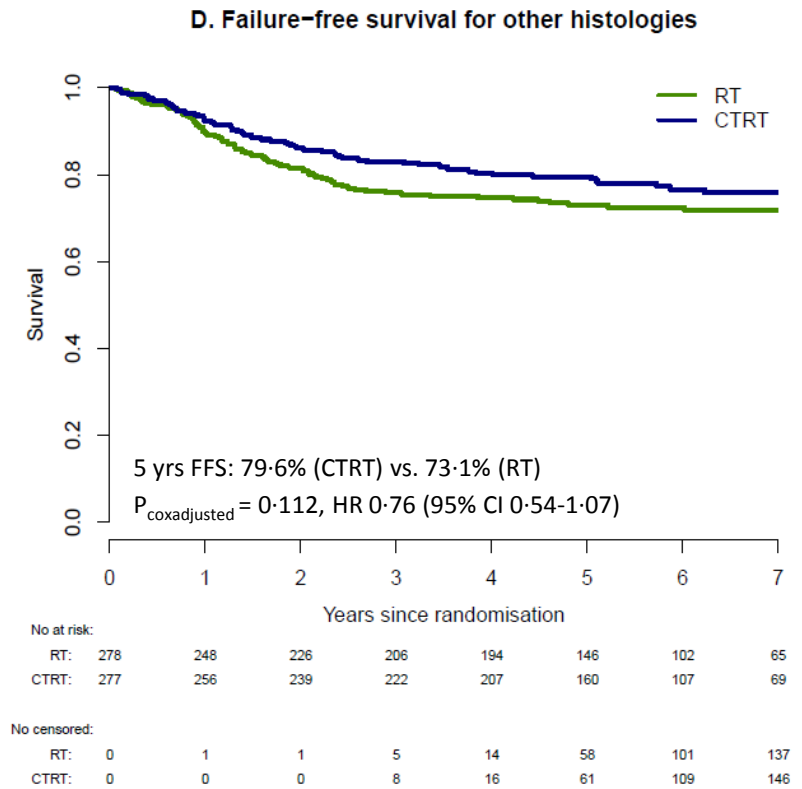

**Figure S5: Overall and failure-free survival**

Kaplan-Meier survival curve for overall survival (A) and failure free survival (B) in patients with stage I/II endometrial cancer. Overall survival and failure-free survival of patients with a histological type other than serous type (C and D).

**A. Overall survival**

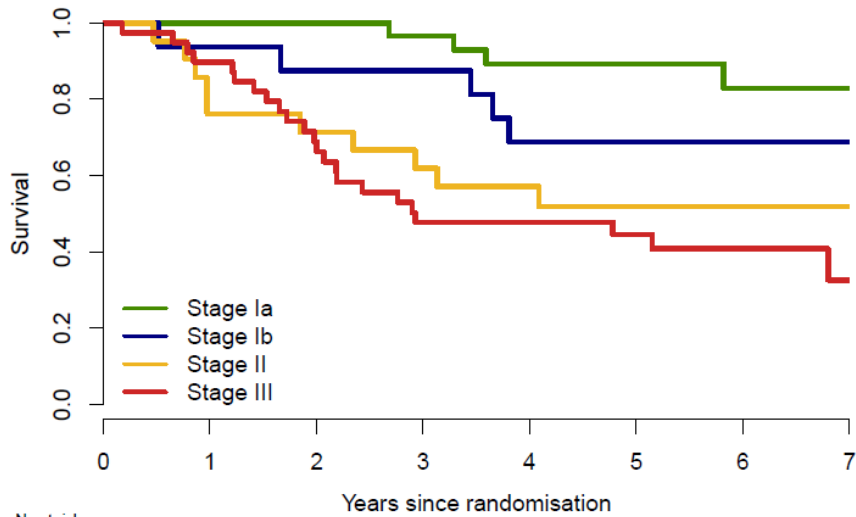

| No at risk: |    | 0  | 1  | 2  | 3  | 4  | 5  | 6  | 7 |
|-------------|----|----|----|----|----|----|----|----|---|
| Stage Ia:   | 29 | 29 | 29 | 27 | 21 | 16 | 12 | 11 |   |
| Stage Ib:   | 16 | 15 | 14 | 14 | 11 | 11 | 6  | 5  |   |
| Stage II:   | 21 | 16 | 15 | 13 | 11 | 7  | 5  | 3  |   |
| Stage III:  | 39 | 35 | 26 | 18 | 17 | 13 | 9  | 2  |   |

  

| No censored: |   | 0 | 1 | 2 | 3 | 4  | 5  | 6  | 7 |
|--------------|---|---|---|---|---|----|----|----|---|
| Stage Ia:    | 0 | 0 | 0 | 1 | 5 | 10 | 13 | 14 |   |
| Stage Ib:    | 0 | 0 | 0 | 0 | 0 | 0  | 5  | 6  |   |
| Stage II:    | 0 | 0 | 0 | 0 | 1 | 4  | 6  | 8  |   |
| Stage III:   | 0 | 0 | 1 | 1 | 2 | 5  | 8  | 14 |   |

**B. Failure-free survival**

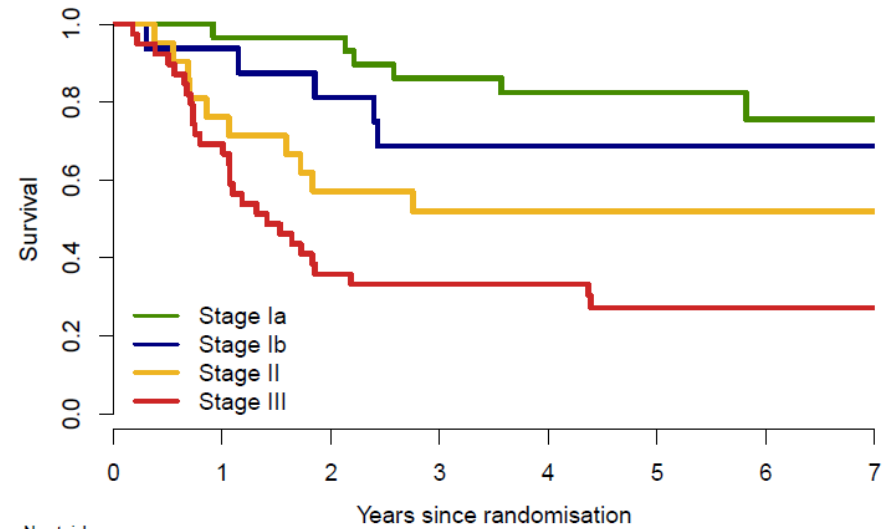

| No at risk: |    | 0  | 1  | 2  | 3  | 4  | 5  | 6 | 7 |
|-------------|----|----|----|----|----|----|----|---|---|
| Stage Ia:   | 29 | 28 | 28 | 24 | 19 | 14 | 10 | 9 |   |
| Stage Ib:   | 16 | 15 | 13 | 11 | 11 | 11 | 6  | 5 |   |
| Stage II:   | 21 | 16 | 12 | 10 | 9  | 6  | 5  | 3 |   |
| Stage III:  | 39 | 27 | 14 | 13 | 12 | 8  | 6  | 2 |   |

  

| No censored: |   | 0 | 1 | 2 | 3 | 4  | 5  | 6  | 7 |
|--------------|---|---|---|---|---|----|----|----|---|
| Stage Ia:    | 0 | 0 | 0 | 1 | 5 | 10 | 13 | 14 |   |
| Stage Ib:    | 0 | 0 | 0 | 0 | 0 | 0  | 5  | 6  |   |
| Stage II:    | 0 | 0 | 0 | 1 | 2 | 5  | 6  | 8  |   |
| Stage III:   | 0 | 0 | 0 | 0 | 1 | 3  | 5  | 9  |   |

**C. Overall survival**

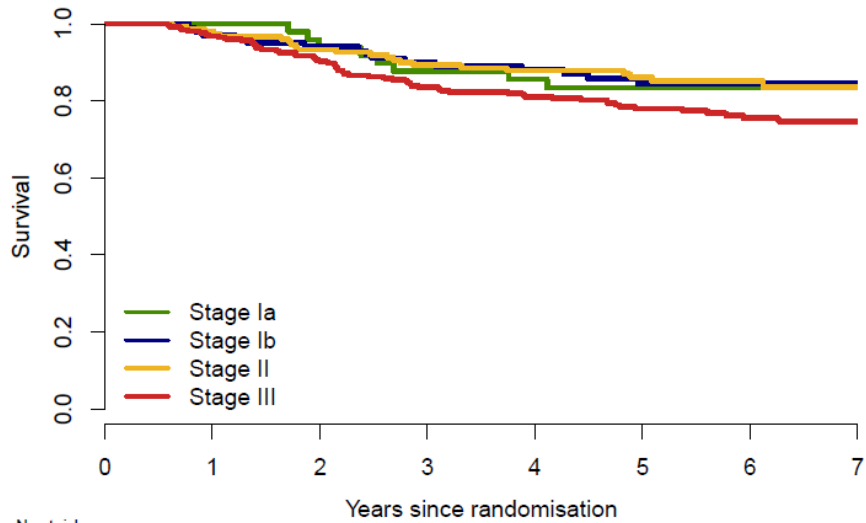

| No at risk: |     | 0   | 1   | 2   | 3   | 4   | 5   | 6  | 7 |
|-------------|-----|-----|-----|-----|-----|-----|-----|----|---|
| Stage Ia:   | 49  | 49  | 46  | 43  | 40  | 30  | 26  | 14 |   |
| Stage Ib:   | 101 | 98  | 95  | 89  | 86  | 60  | 39  | 24 |   |
| Stage II:   | 149 | 146 | 139 | 131 | 121 | 93  | 58  | 42 |   |
| Stage III:  | 256 | 247 | 230 | 210 | 199 | 158 | 111 | 69 |   |

  

| No censored: |   | 0 | 1 | 2 | 3  | 4  | 5  | 6   | 7 |
|--------------|---|---|---|---|----|----|----|-----|---|
| Stage Ia:    | 0 | 0 | 0 | 0 | 2  | 11 | 15 | 27  |   |
| Stage Ib:    | 0 | 0 | 0 | 2 | 3  | 26 | 47 | 62  |   |
| Stage II:    | 0 | 0 | 0 | 2 | 10 | 36 | 70 | 85  |   |
| Stage III:   | 0 | 1 | 1 | 4 | 9  | 43 | 86 | 127 |   |

**D. Failure-free survival**

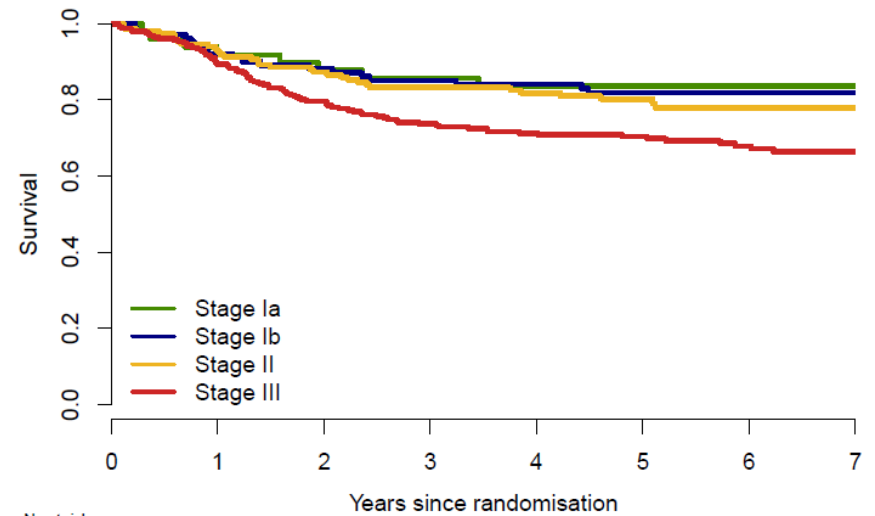

| No at risk: |     | 0   | 1   | 2   | 3   | 4   | 5  | 6  | 7 |
|-------------|-----|-----|-----|-----|-----|-----|----|----|---|
| Stage Ia:   | 49  | 45  | 43  | 41  | 38  | 29  | 25 | 13 |   |
| Stage Ib:   | 101 | 93  | 89  | 84  | 82  | 57  | 36 | 23 |   |
| Stage II:   | 149 | 138 | 130 | 120 | 110 | 84  | 51 | 39 |   |
| Stage III:  | 256 | 228 | 203 | 183 | 171 | 136 | 97 | 59 |   |

  

| No censored: |   | 0 | 1 | 2 | 3  | 4  | 5  | 6   | 7 |
|--------------|---|---|---|---|----|----|----|-----|---|
| Stage Ia:    | 0 | 0 | 0 | 1 | 3  | 12 | 16 | 28  |   |
| Stage Ib:    | 0 | 0 | 0 | 2 | 3  | 26 | 47 | 60  |   |
| Stage II:    | 0 | 0 | 0 | 4 | 12 | 36 | 67 | 79  |   |
| Stage III:   | 0 | 1 | 1 | 6 | 12 | 45 | 80 | 116 |   |

**Figure S6: Overall and failure-free survival**

Kaplan-Meier survival curves for overall survival (A) and failure free survival (B) in patients with serous endometrial cancer among the different stages; and overall survival (C) and failure-free survival (D) in patients with a histological type other than serous cancer among different stages.

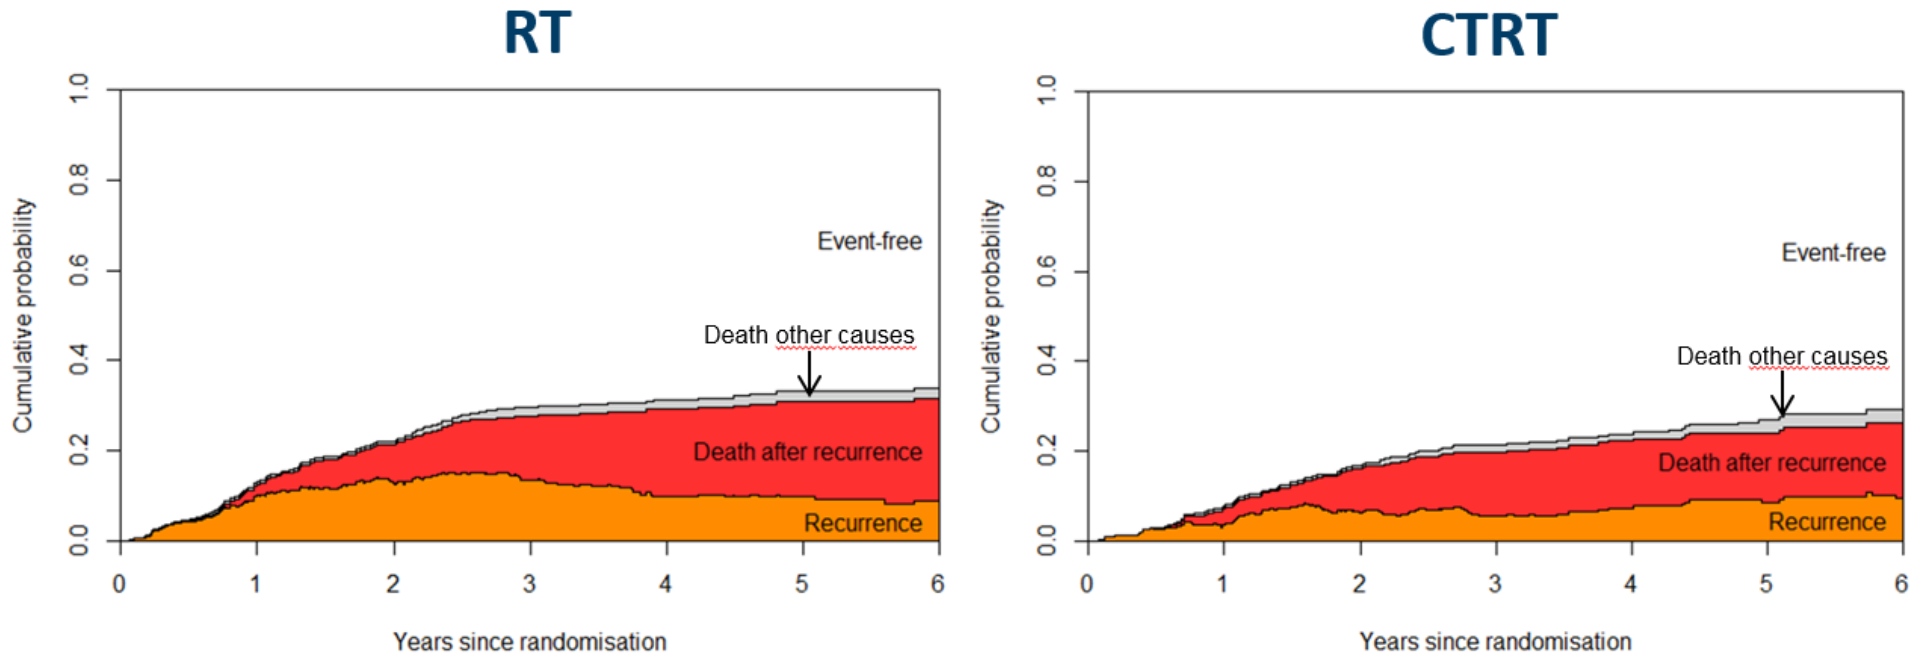

**Figure S7: Events and survival by arm**

For every time point since randomisation the cumulative probability for a patient was given to be: event-free, alive with an event, deceased after event or deceased due to other causes (intercurrent or second cancer).

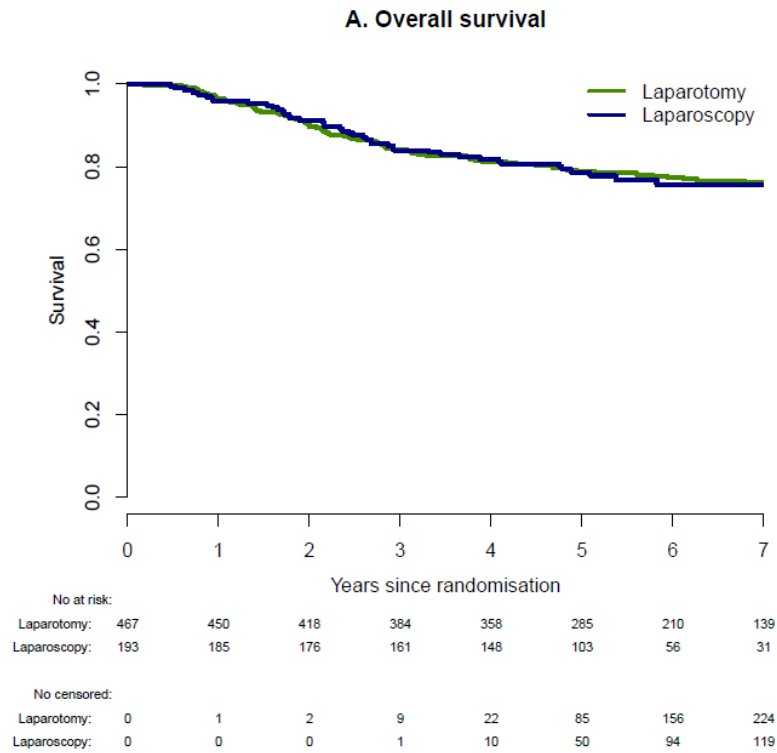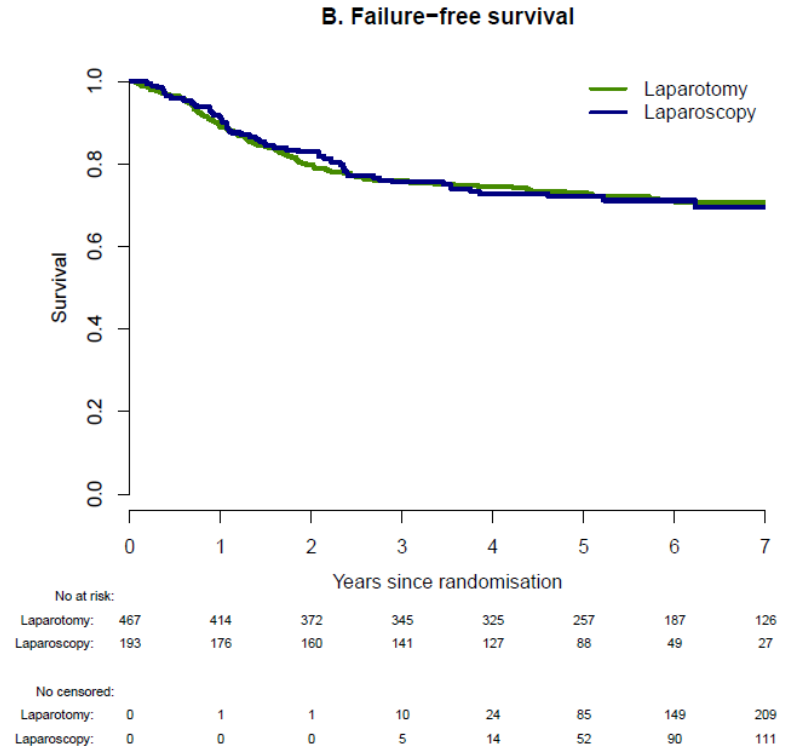

**Figure S8: Overall and failure-free survival**

Kaplan-Meier survival curve for overall survival (A) and failure free survival (B) in patients who underwent laparotomy compared with patient who underwent laparoscopic surgery

**Radiotherapy**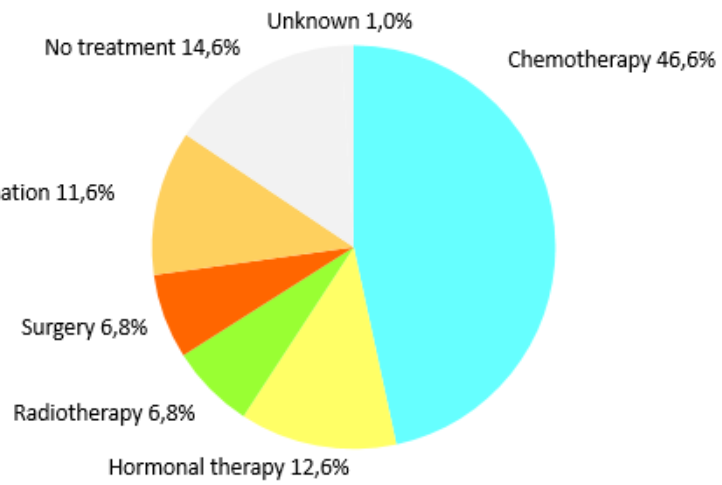**Chemotherapy + radiotherapy**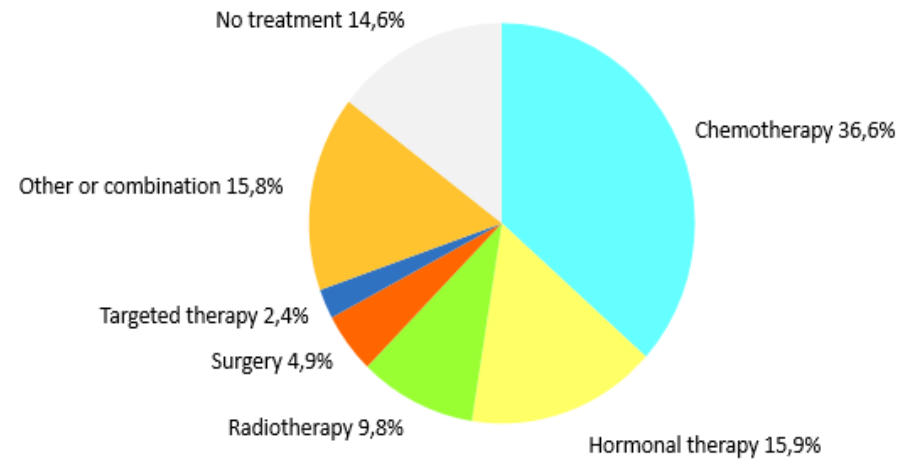**Figure S9: Treatment for first recurrences by treatment arm**
